# Supplementary material for: Photon antibunching in a cluster of giant CdSe/CdS nanocrystals
Source: PubMed Central journal article supplement (PMC5906464; doi:10.1038/s41467-018-03971-w), 2018-04-18
Supplement: 41467_2018_3971_MOESM1_ESM.pdf [file 41467_2018_3971_MOESM1_ESM.pdf]

## Photon Antibunching in a Cluster of Giant CdSe/CdS Nanocrystals

Bihu Lv,<sup>1†</sup> Huichao Zhang,<sup>1,3†</sup> Lipeng Wang,<sup>1</sup> Chunfeng Zhang,<sup>1</sup> Xiaoyong Wang,<sup>1\*</sup> Jiayu Zhang,<sup>2\*</sup> and Min Xiao<sup>1,4\*</sup>

<sup>1</sup>*National Laboratory of Solid State Microstructures, School of Physics, and Collaborative Innovation Center of Advanced Microstructures, Nanjing University, Nanjing 210093, China*

<sup>2</sup>*Advanced Photonics Center, School of Electronic Science and Engineering, Southeast University, Nanjing 210096, China*

<sup>3</sup>*College of Electronics and Information, Hangzhou Dianzi University, Xiasha Campus, Hangzhou 310018, China*

<sup>4</sup>*Department of Physics, University of Arkansas, Fayetteville, Arkansas 72701, USA*

<sup>†</sup>These authors contributed equally to this work.

\*Correspondence to X.W. ([wxiaoyong@nju.edu.cn](mailto:wxiaoyong@nju.edu.cn)), J.Z. ([jy Zhang@seu.edu.cn](mailto:jy Zhang@seu.edu.cn)), or M.X. ([mxiao@uark.edu](mailto:mxiao@uark.edu)).

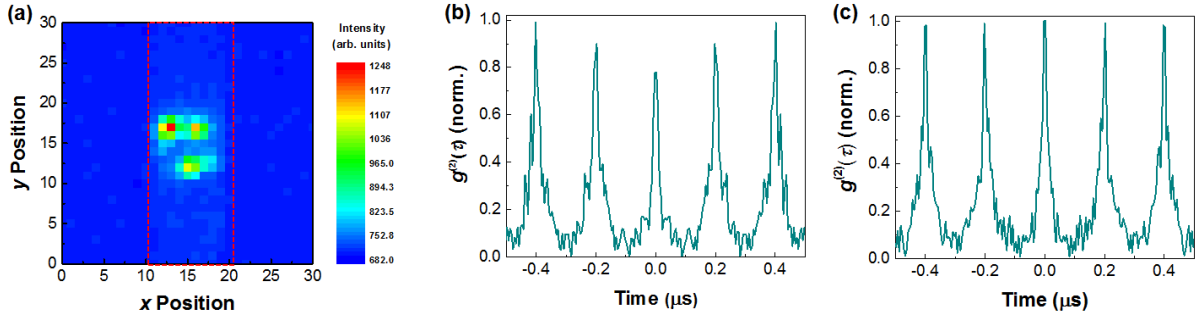

**Supplementary Figure 1 | Photon antibunching measurements of several isolated gNCs.**

**(a)** Photoluminescence (PL) image of three isolated CdSe/CdS gNCs excited at  $\langle N \rangle = 0.1$  with an acquisition time of 1 s. The red dotted box marks the profile of the spectrometer entrance slit corresponding to a sample region of  $3.2 \mu\text{m} \times 9.6 \mu\text{m}$ . **(b)** Second-order photon autocorrelation measurement of these three gNCs with a  $g^{(2)}(\tau)$  value of 0.78 at the zero-time delay. **(c)** Second-order photon autocorrelation measurement of  $>5$  gNCs with a  $g^{(2)}(\tau)$  value approaching one at the zero-time delay. The above optical measurements were performed at the cryogenic temperature of 4 K.

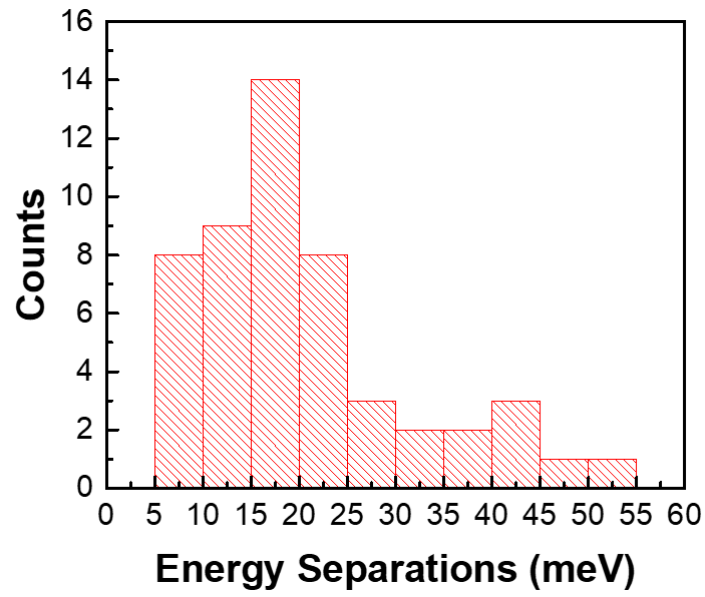

**Supplementary Figure 2 | Energy separations of nearby PL peaks in single gNCCs.**

Statistical histogram for the energy separations between all the nearby peaks in the PL spectra of >30 single gNCCs excited at 4 K with  $\langle N \rangle = 0.1$ .

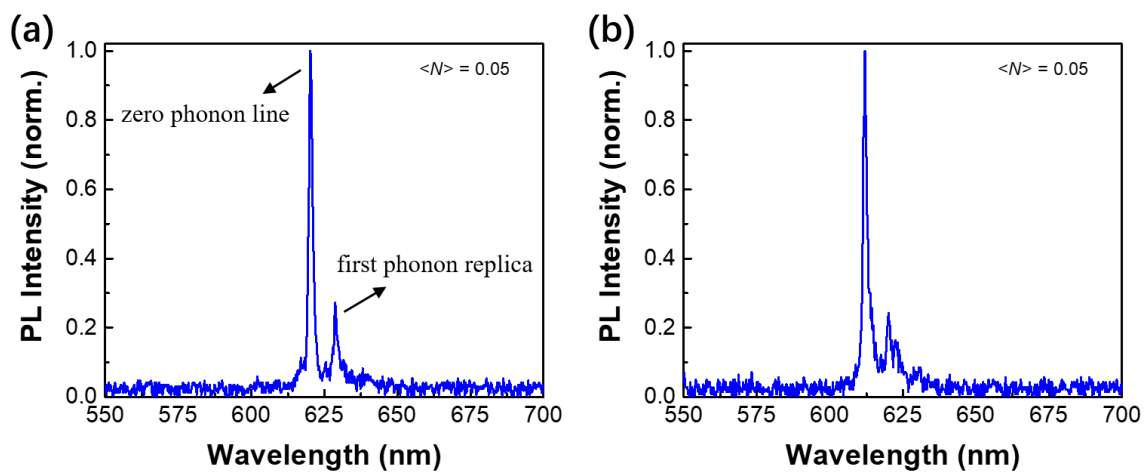

**Supplementary Figure 3 | PL spectra of individual gNCs measured at 4 K. (a), (b)** PL spectra measured with an integration time of 1 s for two representative gNCs excited at  $\langle N \rangle = 0.05$  with the energy separations of 27.5 and 26.5 meV, respectively, between the zero phonon line and the first phonon replica.

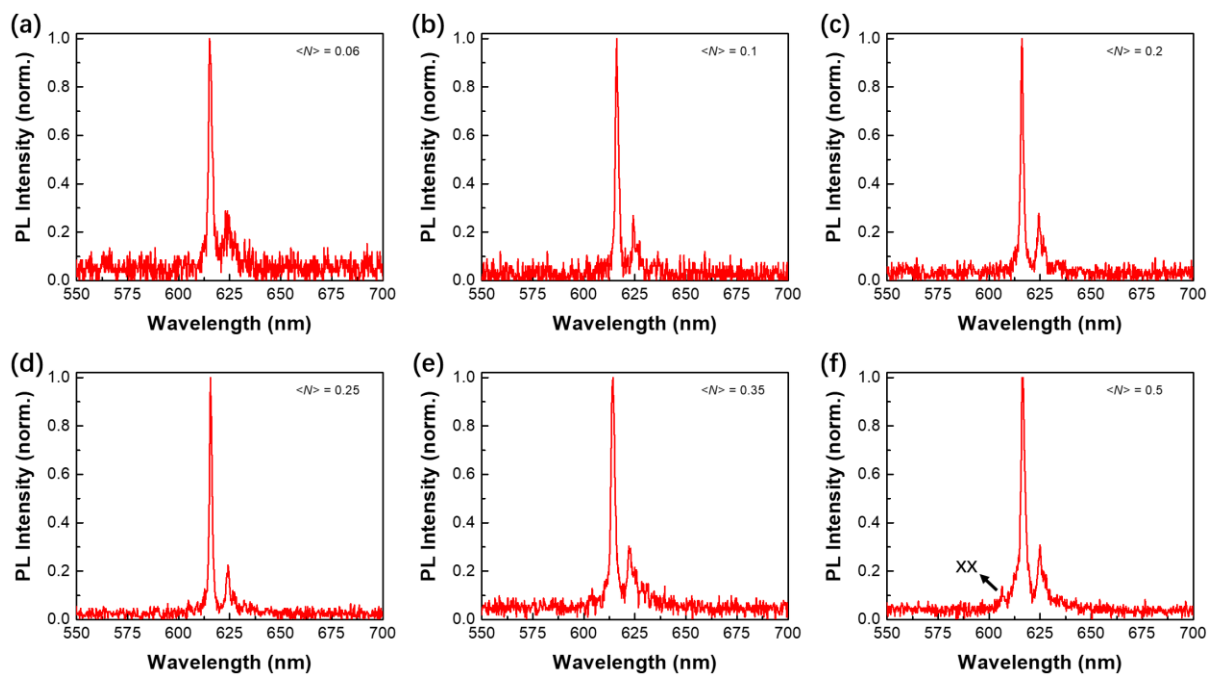

**Supplementary Figure 4 | PL spectra of an individual gNC measured at 4 K.** PL spectra measured with an integration time of 1 s for a representative gNC excited at (a)  $\langle N \rangle = 0.06$ , (b)  $\langle N \rangle = 0.1$ , (c)  $\langle N \rangle = 0.2$ , (d)  $\langle N \rangle = 0.25$ , (e)  $\langle N \rangle = 0.35$ , and (f)  $\langle N \rangle = 0.5$ , respectively. It should be noted that a very weak peak appears on the blue side of the PL spectrum measured at  $\langle N \rangle = 0.5$  and is attributed to the biexciton (XX) recombination with an emission energy 32.1 meV higher than that of the main peak from single excitons.

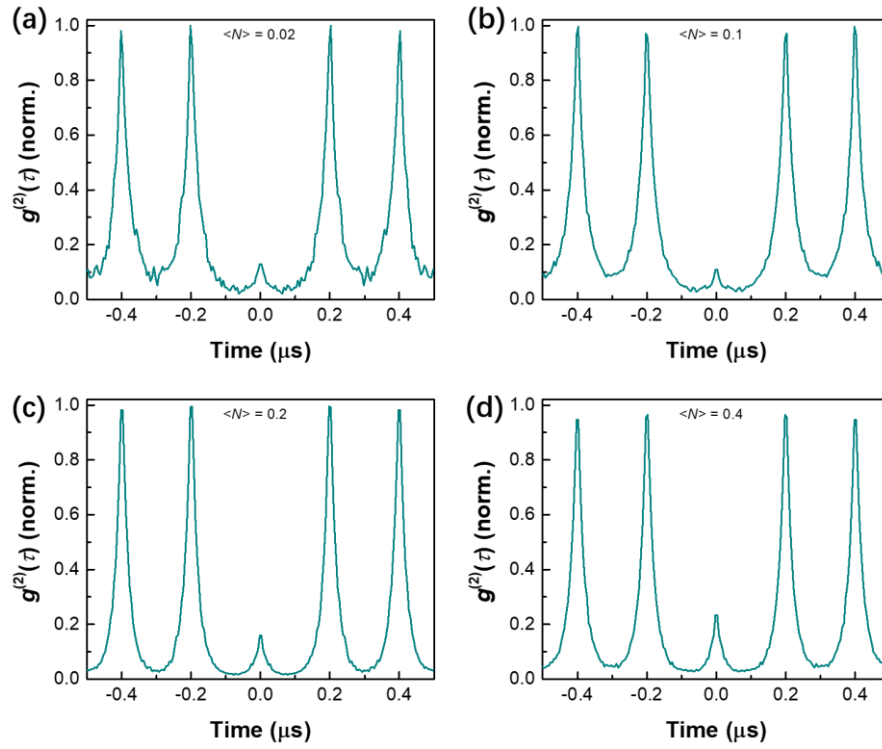

**Supplementary Figure 5 | Photon antibunching of an individual gNCC measured at 4 K.**

The laser excitation power corresponds to (a)  $\langle N \rangle = 0.02$ , (b)  $\langle N \rangle = 0.1$ , (c)  $\langle N \rangle = 0.2$ , and (d)  $\langle N \rangle = 0.4$ , respectively.
